# Supplementary material
Source: PubMed Central journal article supplement (PMC7101505)
Supplement: jama-323-1565-s002.pdf [file jama-323-1565-s002.pdf]

## Supplementary Online Content

Ray KK, et al. Effect of apabetalone added to standard therapy on major adverse cardiovascular events in patients with recent acute coronary syndrome and type 2 diabetes: a randomized clinical trial. *JAMA*. doi:10.1001/jama.2020.3308

Study Committees and Investigators

Trial Registration

Laboratory Analytical Methods

eFigure 1. Kaplan-Meier estimates of pre-specified secondary end points

eFigure 2. Hazard ratios for primary and secondary end points

eFigure 3. Effect of apabetalone on the primary efficacy end point by pre-specified subgroup

eFigure 4. Effect of apabetalone versus placebo on biomarkers over time

eFigure 5. Effect of apabetalone versus placebo on additional selected biochemical measures over time

eFigure 6. eDISH plot assessing liver adverse event

eTable. System organ class treatment-emergent adverse events with at least 2% incidence in either group

Narratives of two cases of elevated alanine aminotransferase and bilirubin

This supplementary material has been provided by the authors to give readers additional information about their work.

| <b>Supplementary Appendix Table of Contents</b>                                                       | <b>Page</b> |
|-------------------------------------------------------------------------------------------------------|-------------|
| <b>1. Study Committees and Investigators</b>                                                          | <b>3</b>    |
| <b>2. Trial Registration</b>                                                                          | <b>7</b>    |
| <b>3. Laboratory Analytical Methods</b>                                                               | <b>7</b>    |
| <b>4. Supplementary eFigures</b>                                                                      |             |
| eFigure 1. Kaplan-Meier estimates of pre-specified secondary end points                               | <b>9</b>    |
| eFigure 2. Hazard ratios for primary and secondary end points                                         | <b>10</b>   |
| eFigure 3. Effect of apabetalone on the primary efficacy end point by pre-specified subgroup          | <b>11</b>   |
| eFigure 4. Effect of apabetalone versus placebo on biomarkers over time                               | <b>12</b>   |
| eFigure 5. Effect of apabetalone versus placebo on additional selected biochemical measures over time | <b>13</b>   |
| eFigure 6. eDISH plot assessing liver adverse event                                                   | <b>14</b>   |
| <b>5. eTable</b>                                                                                      |             |
| System organ class treatment-emergent adverse events with at least 2% incidence in either group       | <b>15</b>   |
| <b>6. Narratives of two cases of elevated alanine aminotransferase and bilirubin</b>                  | <b>16</b>   |

## 1. **\*\*Study Committees and Investigators**

### **Executive Steering Committee**

Kausik K Ray, Chair (UK)

Gregory G Schwartz (USA); Stephen J Nicholls (Australia); Kaymar Kalantar-Zadeh (USA); Peter Toth (USA); Henry Ginsberg (USA).

### **Nonvoting members:**

Sponsor representatives: Michael Sweeney, Norman Wong, Jan Johansson.

### **Independent Academic Statistician:**

Kevin A Buhr (University of Wisconsin).

### **National Leaders**

**Argentina:** Alberto Lorenzatti (Instituto Médico DAMIC, Córdoba); Marisa Vico (Instituto de Investigaciones Clínicas Zárate, Buenos Aires); **Bulgaria:** Maria Milanova (University Multiprofile Hospital for Active Treatment and Emergency Medicine N. I. Pirogov EAD, Sofia); **Croatia:** Goran Milicevic (General Hospital Sveti Duh, Zagreb); Zeljko Popovic (General Hospital Virovitica, Virovitica); **Germany:** Henning Ebelt (Katholisches Krankenhaus St. Johann Nepomuk, Erfurt); **Hungary:** Róbert Gábor Kiss (Magyar Honvédség Egészségügyi Központ, Budapest); **Israel:** Basil Lewis (Lady Davis Carmel Medical Center, Haifa); **Mexico:** Edmundo Bayram Llamas (Fundacion Cardiovascular de Aguascalientes AC, Aguascalientes City); **Poland:** Maciej Banach (Uniwersytecki Szpital Kliniczny im. Wojskowej Akademii Medycznej Centralny Szpital Weteranow, Łódź); **Russia:** Sergey Tereschenko (Russian Cardiology Research and Production Center, Moscow); **Serbia:** Milan Pavlovic (Clinical Center Nis, Niš); **Slovak Republic:** Daniel Pella (CARDIO D&R, s.r.o. Kosice, Košice); **Taiwan:** Chern-En Chiang (Taipei Veterans General Hospital, Taipei).

### **Data Safety Monitoring Board**

Eva Lonn (Chair) (Hamilton, Ontario, Canada), Paul Watkins (Chapel Hill, NC), David Waters (San Francisco, CA) Michael Szarek (New York, NY), Judith Currier (Los Angeles, CA), Lawrence Alan Leiter (Toronto, Ontario Canada),

### **Clinical Events Committee**

John McMurray (Co-Chair); Mark Petrie (Co-Chair); Pardeep Jhund; Matthew Walters; Eugene Connolly; Ninian Lang (all Glasgow, UK)

### **Investigators who enrolled at least 1 patient (in descending order of number of patients enrolled) (2,425 patients enrolled overall)**

**Argentina (263 patients enrolled):** Lilia Schiavi (Clínica Privada Del Prado Sociedad de Responsabilidad Limitada, Córdoba); Marisa Vico (Instituto de Investigaciones Clínicas Zárate, Buenos Aires); Laura Maffei (Consultorios Asociados Endocrinología E Investigación Clínica Aplicada, Buenos Aires); Anselmo Bordonava (Clínica FUSAVIM Privada, Villa Maria); Aldo Prado (Investigaciones Clinicas Tucuman, SanMiguel De Tucumán); Julio Vallejos (Instituto de Cardiologia de Corrientes Juana Francisca Cabral, Corrientes); Javier Farias (Sanatorio Guemes, Buenos Aires); Lucrecia Nardone (Centro Médico Privado CEMAIC, Córdoba); Jorge Resk (Instituto Del Corazón, Córdoba); Orlando Caruso (Hospital Central, Mendoza City); Alberto Lorenzatti (Instituto Médico DAMIC, Córdoba); Natacha Maldonado (Instituto de Hematología Y Medicina Clinica Dr Ruben Davoli, Rosario); Lucio Padilla (Instituto Cardiovascular de

Buenos Aires, Buenos Aires); Miguel Hominal (Centro de Investigaciones Clínicas Del Litoral SRL, Santa Fe); Hugo Luquez (Centro Médico Luquez - Rx Trials, Córdoba); Georgina Sposetti (Instituto de Investigaciones Clínicas Mar Del Plata, Mar Del Plata); Alberto Caccavo (Clinica Coronel Suarez, Buenos Aires); Jorge Glenn (Bioclinica Buenos Aires – PPDS, Buenos Aires); Virginia Mansilla (Axismed SRL - Clinica Mayo, San Miguel de Tucumán); Maria Alvarez (Axismed SRL - Clinica Mayo, San Miguel de Tucumán); Maria Parody (Hospital San Roque, Córdoba); Rodolfo Sarjanovich (Hospital Cordoba, Córdoba); Maria Klyver (Centro Modelo de Cardiología, San Miguel de Tucumán) Maria Eugenia Valdez (Centro Modelo de Cardiología, San Miguel de Tucumán); Hugo Colombo (Fundación Clínica Colombo, Córdoba); Claudia Baccaro (CIMEL, Buenos Aires); Virginia Visco (DIM Clínica Privada, Ramos Mejia); Julio Bono (Sanatorio Allende S.A., Córdoba); Carlos Cuneo (Prevencion Cardio Vascular, Salta); Fredy Ferré Pácora (Centro Médico Colón, Córdoba); Pablo Guzman (Sanatorio San Francisco, Santiago Del Estero); Daniel Piskorz (Sanatorio Britanico de Rosario); Daniel Vogel (Instituto de Investigaciones Clinicas Bahia Blanca, Buenos Aires).

**Bulgaria (166 patients enrolled):** Mladen Grigorov (Second Multiprofile Hospital for Active Treatment Sofia, Sofia); Plamen Gatzov (Second Multiprofile Hospital for Active Treatment Sofia, Sofia); Miroslav Stoyanov (Multiprofile Hospital For Active Treatment Dr Tota Venkova, Gabrovo ); Emilya Apostolova (Multiprofile Hospital For Active Treatment - Dr. Bratan Shukerov AD, Smolyan); Maria Milanova (University Multiprofile Hospital for Active Treatment and Emergency Medicine N. I. Pirogov EAD, Sofia); Ivo Petrov (Acibadem City Clinic University Multiprofile Hospital for Active Treatment EOOD, Sofia); Atanas Angelov (Multiprofile Hospital for Active Treatment Sveta Marina EAD, Varna ); Petar Lazov (Multiprofile Hospital For Active Treatment - Pazardzhik AD, Pazardzhik); Valentina Grigorova (Medical Center Kardiohelp EOOD, Sofia); Todor Yanev (Synexus Affiliate - Diagnostic and Consulting Center Ascendent, Sofia); Emilena Vuchkova (Medical Center Orfey OOD, Stara Zagora); Dobrin Vassilev (University Multiprofile Hospital for Active Treatment Aleksandrovska EAD, Sofia); Snezhanka Tisheva (University Multiprofile Hospital for Active Treatment - Dr. Georgi Stranski EAD, Pleven); Valeri Gelev (Acibadem City Clinic Multiprofile Hospital for Active Treatment Tokuda, Sofia).

**Croatia (43 patients enrolled)** Silvia Canecki-Varzic (Clinical Hospital Centre Osijek, Osijek); Zeljko Popovic (General Hospital Virovitica, Virovitica); Srecko Tusek (Specijalna Bolnica za Medicinsku Rehabilitaciju Krapinske Toplice, Krapinske Toplice); Ema Drvodelić Šunić (Opca Bolnica Karlovac, Karlovac ); Goran Milicevic (Clinical Hospital Sveti duh, Zagreb); Marica Jandric-Balen (General Hospital Dr Josip Bencevic, Slavonski Brod ); Nikolina Marinic (General Hospital Dr Josip Bencevic, Slavonski Brod); Natasa Moser (General Hospital Dr Josip Bencevic, Slavonski Brod).

**Germany (32 patients enrolled)** Henning Ebelt (Katholisches Krankenhaus St. Johann Nepomuk, Erfurt); Mohammed Natour (Heidelberger Praxisklinik für Kardiologie, Heidelberg); Peter Schwimbeck (Klinikum Leverkusen GmbH, Leverkusen); Karl-Friedrich Appel (Studienzentrum Dr. Appel, Kassel); Klaus Kleinertz (Medizinisches Versorgungszentrum am Küchwald GmbH, Chemnitz).

**Hungary (223 patients enrolled)** Béla Merkely (Semmelweis Egyetem, Budapest); András Papp (Szent Rókus Kórház és Intézményei, Budapest); Robert Kiss (Magyar Honvédség Egészségügyi Központ, Budapest); Zsolt Kovács (Bajai Szent Rókus Kórház, Baja); András Vértes (Del-pesti Centrumkorhaz-Orszagos Hematologiai és Infektologiai Intezet, Budapest); Zsolt Sárszegi (Coromed-SMO Kft., Pecs); Ernő Kis (Tolna Megyei Balassa János Kórház, Szekszárd ); Amália Benedek (Fejer Megyei Szent Gyorgy Egyetemi Oktato Korhaz, Székesfehérvár); János Takács (TaNaMed Kft., Mosonmagyaróvár); Aniko Papp (Grof Tisza Istvan Korhaz Berettyoujfalu, Berettyóújfalu ); Andras Matoltsy (Kanizsai Dorottya Kórház, Nagykanizsa ); Peter Andrassy (Bajcsy-Zsilinszky Korhaz es Rendelointezet, Budapest); Imre Ungi (Szegedi Tudományegyetem Szent-Gyorgyi Albert Klinikai Kozpont, Szeged).

**Israel (381 patients enrolled)** Michael Shechter (Chaim Sheba Medical Center, Ramat-Gan); Shaul Atar (Galilee Medical Center, Nahariya); Avraham Shotan (Hillel Yaffe Medical Center, Hadera); Alicia Vazan

(Hillel Yaffe Medical Center, Hadera); Ronny Alcalai (Hadassah University Hospital Mount Scopus, Jerusalem); Chaim Lotan (Hadassah University Hospital Ein Kerem, Jerusalem); Basil Lewis (Lady Davis Carmel Medical Center, Haifa); Tony Hayek (Rambam Health Corporation, Haifa); Mady Moriel (Shaare Zedek Medical Center, Jerusalem); Amos Katz (Barzilai Medical Center, Ashkelon); Idit Liberty (Soroka University Medical Centre, Beer Sheva); Ilana Harman-Boehm (Soroka University Medical Centre, Beer Sheva); Elad Schiff (Bnei Zion Medical Center, Haifa); Oscar Kracoff (Kaplan Medical Center, Rehovot); Yoseph Rozenman (Edith Wolfson Medical Center, Holon); Morris Mosseri (Meir Medical Center, Kfar Saba); Ladislav Slezak (Linn Medical Center Clalit Health Services, Haifa); Muhammad Sabbah (Linn Medical Center Clalit Health Services, Haifa); David Zeltser (Tel Aviv Sourasky Medical Center, Tel-Aviv); Khaled Adawi (Baruch Padeh Poriya Medical Center, Tiberias); Muhamed Omary (Nazareth EMMS Hospital, Nazareth); Rosane Abramof Ness (Clalit Health Medical Center, Tel Aviv); Faiad Adawi (ZIV Medical Center, Safed).

**Mexico (367 patients enrolled)** Jose Garza Ruiz (IMED Internal Medicine Clin Trials, Monterrey); Jorge Carrillo (Hospital Central Dr Ignacio Morones Prieto, San Luis Potosí); Luis Alejandro Nevarez Ruiz (Investigacion en Salud y Metabolismo S.C., Chihuahua); Pedro Garcia Hernandez (Hospital Universitario Dr. Jose Eleuterio González, Monterrey); Maria Arechavaleta-Granell (Arechavaleta Granell Maria del Rosario, Guadalajara); Manuel De los Rios Ibarra (Centro Para el Desarrollo de la Medicina y de Asistencia Especializada SC, Culiacan); Raul Velasco-Sanchez (Hospital Dr Angel Leña universidad Autonoma de Guadalajara AC, Zapopan); Hugo Laviada Molina (Centro de Desarrollo Biomédico, Merida); Lucas Solis Morales (Centro de Alta Especialidad Dr. Rafael Lucio, Xalapa); Efrain Montano Gonzalez (Centro de Investigacion Medico Biologica y de Terapia Avanzada S.C., Gudalajara); Guillermo Llamas Esperón (Hospital Cardiológica Aguascalientes, Aguascalientes); Edmundo Alfredo Bayram Llamas (Fundacion Cardiovascular de Aguascalientes AC, Aguascalientes); Cynthia Mustieles Rocha (Investigacion Biomedica Aplicada de Hidalgo S.A. de C.V., Pachuca); Rodrigo Suarez-Otero (INBIOMEDYC Toluca, Toluca); Manuel Aguilera Real (Centro de Investigación Biomedica y Farmaceutica, Ciudad de México); Eliud Montes Cruz (Fundación de Atención e Investigación Médica Lindavista S.C., Ciudad de México); Humberto Alvarez Lopez (Dr. Humberto Alvarez Lopez, Zapopan); Susano Lara Vaca (Hospital Angeles Leon, León); Guillermo Fanghanel-Salmon (Clinica Integral del Paciente Diabetico y Obeso, Mexico City); Carlos Hernandez Herrera (Instituto Cardiovascular de Monclova, Monclova); Joel Rodriguez Saldaña (Diabetes Total, S.A de C.V., Pachuca); Elier Pedroza Garcia (Centro de Investigacion y Atencion de Diabetes, Endocrinologia y Nutricion, Durango); Maricela Vidrio Velázquez (Unidad de Investigacion Clinica Cardiometabolica de Occidente SC, Guadalajara); Ignacio Rodriguez Briones (Cardioarritmias e Investigación S.C., San Luis Potosí).

**Netherlands (4 patients enrolled)** Bas Hamer (Meander Medisch Centrum, Amersfoort); Ton Slagboom (OLVG locatie Oost, Amsterdam).

**Poland (165 patients enrolled)** Aleksander Zurkowski (Malopolskie Centrum Sercowo-Naczyniowe, Chrzanow); Marcin Debinski (Polsko-Amerykanske Kliniki Serca, Dabrowa Gornicza); Iwona Kobielsz-Gembala (Medicome Sp. z o.o., Oswiecim); Radoslaw Bartkowiak (Niepubliczny Zaklad Opieki Zdrowotnej Centrum Usług Medycznych Promont-Med., Kielce); Marek Rajzer (Zespol Przychodni Specjalistycznych DIAB-END-COR Sp. z o.o., Kraków); Adam Witkowski (Instytut Kardiologii im Prymasa Tysiaclecia Kardynala Stefana Wyszynskiego, Warszawa); Alicja Kowalisko (Centrum Kardiologiczne Pro Corde Sp. z o.o. Niepubliczny Zaklad Opieki Zdrowotnej, Wroclaw); Marek Piepiorka (Gabinet Kardiologiczno-Internistyczny, Gdynia); Karol Stania (Polsko-Amerykanske Kliniki Serca, Nysa); Michal Domzal (Rodzinne Centrum Zdrowia, Otwock); Janusz Korecki (Podlaski Osrodek Kardiologii Poradnia Prywatna, Bialystok); Romuald Korzeniak (Niepubliczny Zaklad Opieki Zdrowotnej Specjalistyczna Przychodnia Lekarska "MEDIKARD", Plock); Lukasz Mazurkiewicz (Centrum Medyczne doktora,

Warszawa); Ewa Mirek-Bryniarska (Szpital Specjalistyczny im. Jozefa Dietla w Krakowie, Kraków); Maciej Banach (Uniwersytecki Szpital Kliniczny im. Wojskowej Akademii Medycznej Centralny Szpital Weteranów, Łódź); Katarzyna Madziarska (WRO MEDICA, Wrocław); Adam Młodziankowski (Polsko-Amerykańskie Kliniki Serca, Mielec); Barbara Rewerska (Diamond Clinic, Kraków); Zbigniew Gaciong (Niepubliczny Zakład Opieki Zdrowotnej AURUM, Warszawa); Maciej Mazurkiewicz (Prywatna Praktyka Lekarska MAZ-MEDICA Maciej R. Mazurkiewicz, Łódź).

**Russian Federation (112 patients enrolled)** Ivan Maksimov (Research Cardiology Institute of Tomsk Scientific Center of RAMS Siberian Branch, Tomsk); Yuri Shvarts (Saratov State Medical University, Saratov); Larisa Khaisheva (Municipal Budgetary Healthcare Institution City Emergency Hospital); Vasily Samitin (State Healthcare Institution Regional Clinical Cardiology Dispensary, Saratov); Svetlana Boldueva (North-West State Medical University n.a. I.I. Mechnikov, St. Petersburg); Mikhail Zykov (City Hospital #4, Sochi); Olga Barbarash (Research Institute of Complex Cardiovascular Pathology, Kemerovo); Victor Kostenko (St Petersburg City Outpatient Clinic #109, St. Petersburg); Elena Kulibaba (State Budgetary Healthcare Institution of Vladimir Region City Hospital No. 4, Vladimir); Olga Smolenskaya (Ural State Medical University, Yekaterinburg); Nikolay Tarasov (Federal Budget Healthcare Institution Medici - sanitary unit of Ministry of internal affairs of Russ, Kemerovo); Zaur Shogenov (Moscow City State Budgetary Healthcare Institution City Clinical Hospital named after V.V. Veresayev, Moscow); Leonid Strongin (City Hospital 13, Nizhniy Novgorod); Anatoly Kuzin (City Clinical Hospital #6, Chelyabinsk); Valeriy Makukhin (Krasnodar Regional Clinical Hospital #2, Krasnodar); Konstantin Nikolaev (State Budgetary Healthcare Institution of Novosibirsk Region City Clinical Hospital No. 19, Novosibirsk); Sergey Tereschenko (Russian Cardiology Research and Production Center, Moscow); Natalya Vezikova (Republican Hospital n.a. V.A. Baranov, Petrozavodsk).

**Serbia (462 patients enrolled)** Vladimir Miloradovic (Clinical Center Kragujevac, Kragujevac); Milan Pavlovic (Clinical Center Nis, Nis); Marina Deljanin Ilic (Institute Niska Banja, Niska Banja); Dragan Simic (Clinical Center of Serbia, Belgrade); Georgina Pudar-Brankovic (Euromedik, Belgrade); Tanja Jozic (Clinical Center of Serbia, Belgrade); Slobodan Dodic (Institute of Cardiovascular Diseases of Vojvodina, Sremska Kamenica); Arsen Ristic (Clinical Center of Serbia, Belgrade); Sasa Hinic (Clinical Hospital Center Bezanijska Kosa, Belgrade); Vladimir Mitov (Health Center Zajecar, Zajecar); Natasa Stokuca-Korac (Institute of Cardiovascular Diseases Dedinje, Belgrade); Edita Stokic (Clinical Centre of Vojvodina, Novi Sad); Vera Celic (KBC Dr Dragisa Misovic Dedinje, Belgrade); Nebojsa Despotovic (Clinical Hospital Centar Zvezdara, Belgrade); Dragan Dincic (Military Medical Academy, Belgrade); Biljana Putnikovic Totic (Clinical Hospital Centre Zemun, Belgrade); Aleksandar Selakovic (General Hospital Uzice, Uzice).

**Slovakia (169 patients enrolled)** Daniel Pella (CARDIO D&R, s.r.o. Kosice, Kosice); Milan Banik (MEDI M&M s.r.o., Moldava nad Bodvou); Jan Fedacko (CARDIO D&R, s.r.o. Kosice, Kosice); Karol Micko (KARDIOMED s.r.o., Lucenec); Tibor Duris (Cardioinvest s. r. o., Nove Zamky); Martin Kokles (Univerzitna nemocnica Bratislava, Bratislava); Beata Lachova (DIAB s.r.o., Roznava); Andrej Dzipina (ALIAN, s.r.o., Bardejov); Juraj Mazur (Kardio-Onkologia, s.r.o., Dolny Kubin); Ingrid Bugarova (MEDIVASA, s.r.o., Zilina); Milan Behuncik (Nemocnica Zeleznicne zdravotnictvo Kosice – ZVET ZDRAVIA - PPDS, Kosice); Silvia Vadinova (Nemocnica s poliklinikou Nove Mesto nad Vahom n.o., Nove Mesto nad Vahom).

**Taiwan (38 patients enrolled)** Hung-I Yeh (Mackay Memorial Hospital-Taipei branch, Taipei); Chern-En Chiang (Taipei Veterans General Hospital, Taipei); Cheng-Hen Lee (National Cheng Kung University Hospital, Tainan); I-Chang Hsieh (Chang Gung Medical Foundation Linkou Branch, Taoyuan); Lin Jiunn-Lee (National Taiwan University Hospital, Taipei); We-Hsiang Lin (Tri-Service General Hospital, Taipei); Yen-Wen Wu (Far Eastern Memorial Hospital, New Taipei); Chien Hsun Hsia (Changhua Christian Hospital, Changhua); Ping Han Lo (China Medical University Hospital, Taichung).

## 2. Trial Registration

Registration for study RVX222-CS-015 was submitted to ClinicalTrials.gov on 10/25/2015.

- The first patient was screened on 11/04/2015 and was randomized on 11/11/2015.

## 3. Laboratory analytical methods

Clinical laboratory samples were collected and analyzed for calculated LDL cholesterol (LDL-C), Triglycerides (TG), Total Cholesterol (TC), HDL cholesterol (HDL-C), high-sensitivity C-reactive protein (hsCRP), alkaline phosphatase (ALP), alanine aminotransferase (ALT), bilirubin, gamma-glutamyl transferase (GGT), creatinine and estimated glomerular filtration rate (eGFR) at clinic visits as per the study protocol. All analyses were performed at a central laboratory (ICON).

- **LDL-C** was calculated using the Friedewald equation:  $\text{LDL-C in mg/dl} = \text{total cholesterol} - (\text{HDL-C} + \text{TGs}/5)$ .
  - If TGs exceeded 400 mg/dl, direct measurement of LDL-C was performed using the MULTIGENT Direct LDL assay on the Abbott ARCHITECT analyzer.
- **Total cholesterol and TGs** were quantified using enzymatic methods and the Abbott ARCHITECT System instrumentation.
- **HDL-C** was quantified using the Ultra HDL assay run on the Abbott ARCHITECT analyzer.
- **hsCRP** was measured using the MULTIGENT CRP Vario immunoassay run on the Abbott ARCHITECT analyzer.
- **ALP**: Alkaline phosphatase catalyzes the hydrolysis of colorless p-nitrophenyl phosphate (p-NPP) to give p-nitrophenol and inorganic phosphate. At the pH of the assay (alkaline), the p-nitrophenol is in the yellow phenoxide form. The rate of absorbance increase at 404 nm is directly proportional to the alkaline phosphatase activity in the sample. Analyzed on the Abbott ARCHITECT system.
- **ALT**: ALT present in the sample catalyzes the transfer of the amino group from L-Alanine to 2-Oxoglutarate, in the presence of Pyridoxal-5'-Phosphate, forming Pyruvate and L-Glutamate. Pyruvate in the presence of NADH and Lactate Dehydrogenase (LD) is reduced to L-Lactate. In this reaction NADH is oxidized to NAD. The reaction is monitored by measuring the rate of decrease in absorbance at 340 nm due to the oxidation of NADH to NAD. Analyzed on the Abbott ARCHITECT system.
- **Bilirubin**: bilirubin assay is based on the reaction of bilirubin with a diazo reagent to form the colored compound azobilirubin. The increase in absorbance at 548 nm due to azobilirubin is directly proportional to the total bilirubin concentration. Analyzed on the Abbott ARCHITECT system.
- **GGT**: GGT catalyzes the transfer of the gamma-glutamyl group from the donor substrate (L-gamma-glutamyl-3-carboxy-4-nitroanilide) to the glycylglycine acceptor to yield 3-carboxy-4-nitroaniline. The rate of the absorbance increase at 412 nm is directly proportional to the GGT in the sample. Analyzed on the Abbott ARCHITECT system.
- **Creatinine**: At an alkaline pH, creatinine in the sample reacts with picrate to form a creatinine-picrate complex. The rate of increase in absorbance at 500 nm due to the formation of this complex is directly proportional to the concentration of creatinine in the sample. Analyzed on the Abbott ARCHITECT system.
- **eGFR** was calculated using the Cockford-Gault formula:

eGFR in mL/min/1.73m<sup>2</sup> = (140 – Age) × Weight in kg × [1.23 for men or 1.04 for women]  
/ serum creatinine in umol/L  
eGFR was calculated from available serum creatinine data and age and weight at  
baseline.



#### 4. Supplementary eFigures

**eFigure 1. Kaplan-Meier estimates of pre-specified secondary endpoints.**

Panel A, shows all-cause mortality; Panel B, shows cardiovascular death; Panel C, shows cardiovascular death or non-fatal myocardial infarction; Panel D, shows coronary heart disease death or non-fatal myocardial infarction; Panel E, shows non-fatal myocardial infarction; Panel F, shows stroke; Panel G, shows cardiovascular death, non-fatal myocardial infarction, stroke, hospitalization for unstable angina or urgent or emergency coronary revascularization procedures; Panel H, shows first hospitalization for congestive heart failure

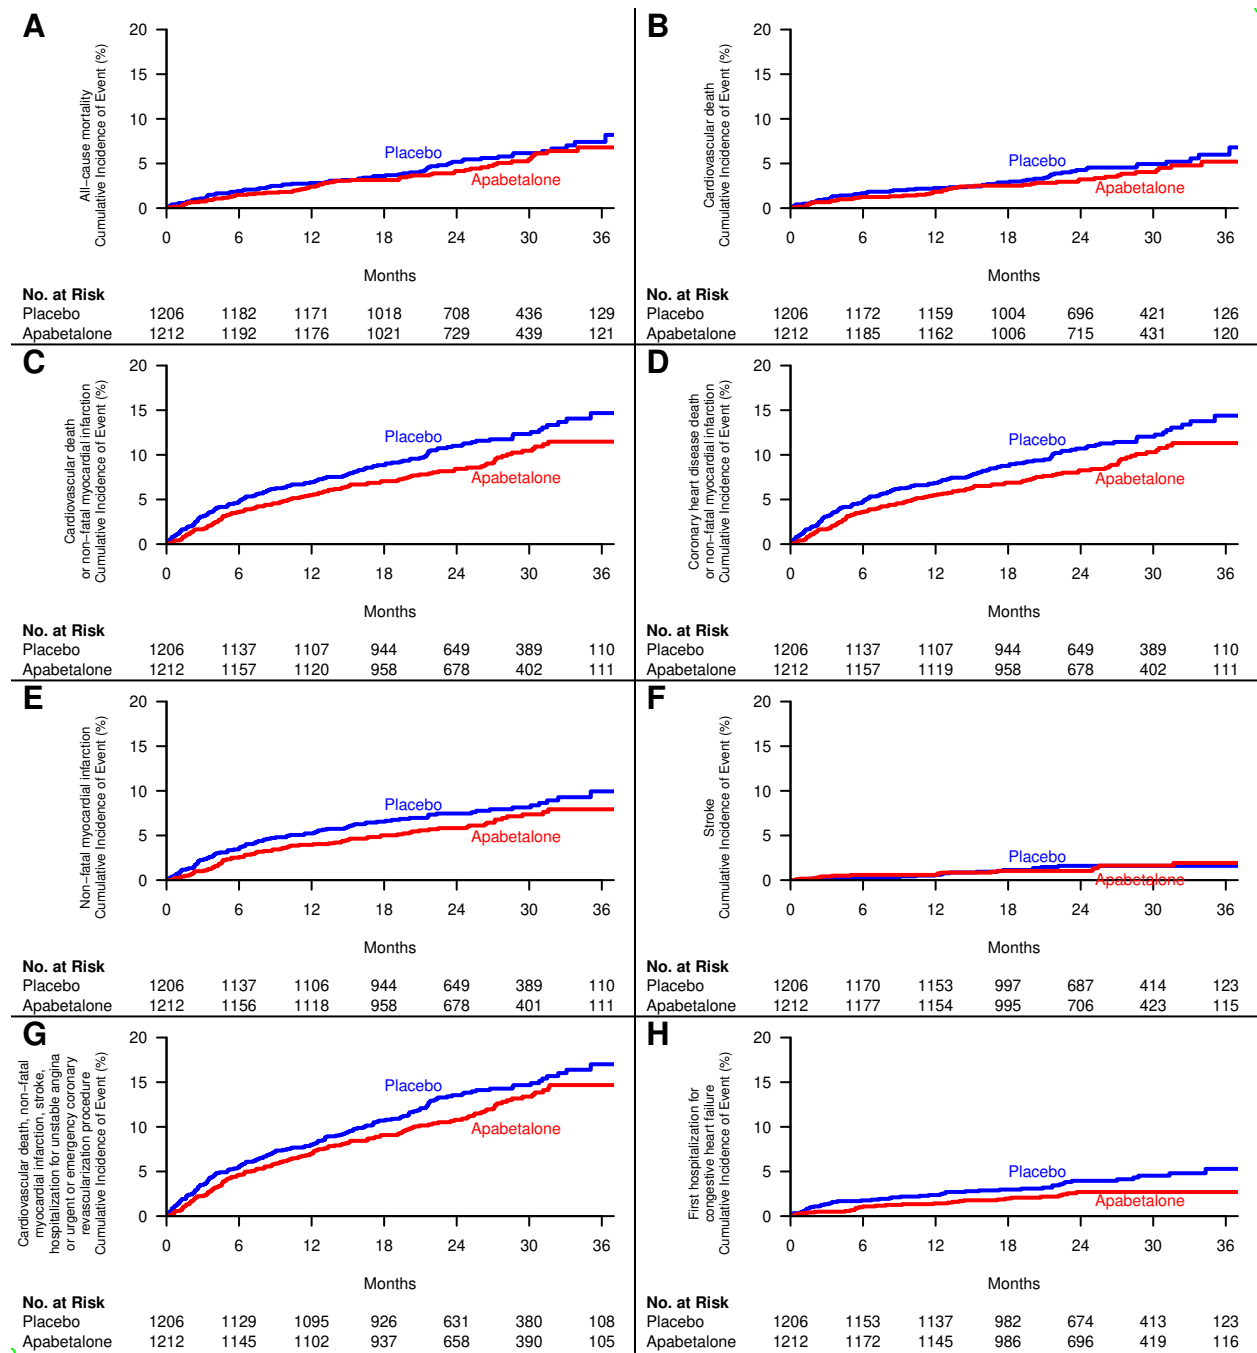

**eFigure 2. Hazard ratios for primary and secondary end point events.**

The primary end point comprised cardiovascular death, non-fatal myocardial infarction or stroke. The primary endpoint was not significantly modified by assigned treatment; therefore, the pre-specified hierarchical hypothesis testing statistical plan states that no statistical inference of significance (or lack) should be drawn from secondary endpoints. Hazard ratios and confidence intervals for secondary endpoints are provided for descriptive purposes only. Numbers of events (% of patients) in each treatment group are shown, as are hazard ratios and 95% confidence intervals. \*First and recurrent event endpoints include multiple events per patient. Total number of events experienced by treatment group are given.

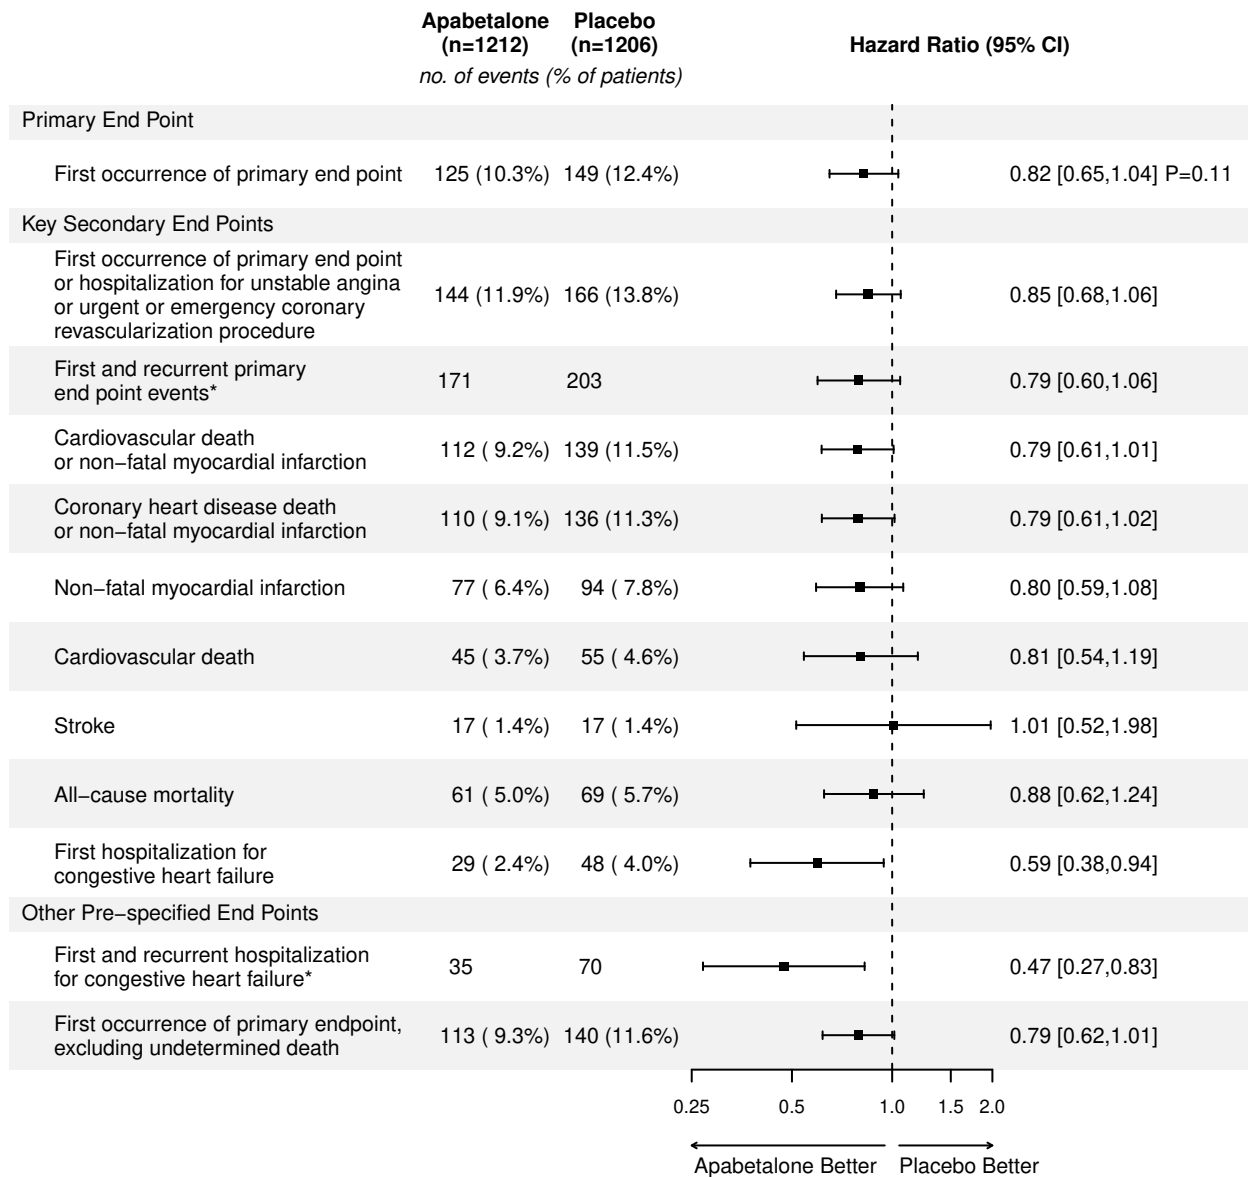

**eFigure 3. Effect of apabetalone on the primary efficacy end point by pre-specified subgroup**

Values shown represent hazard ratios (HR) and 95% confidence intervals (CI) for the primary endpoint (first occurrence of cardiovascular death, non-fatal myocardial infarction, or stroke) for pre-specified baseline subgroups. Also shown are number of first events, numbers of patients, and percentage of patients with an event. P-values for treatment/subgroup interaction are based on a Cox proportional hazards model stratified by statin and region (or, for the statin subgroups, region only). No adjustment was made for multiple comparisons.

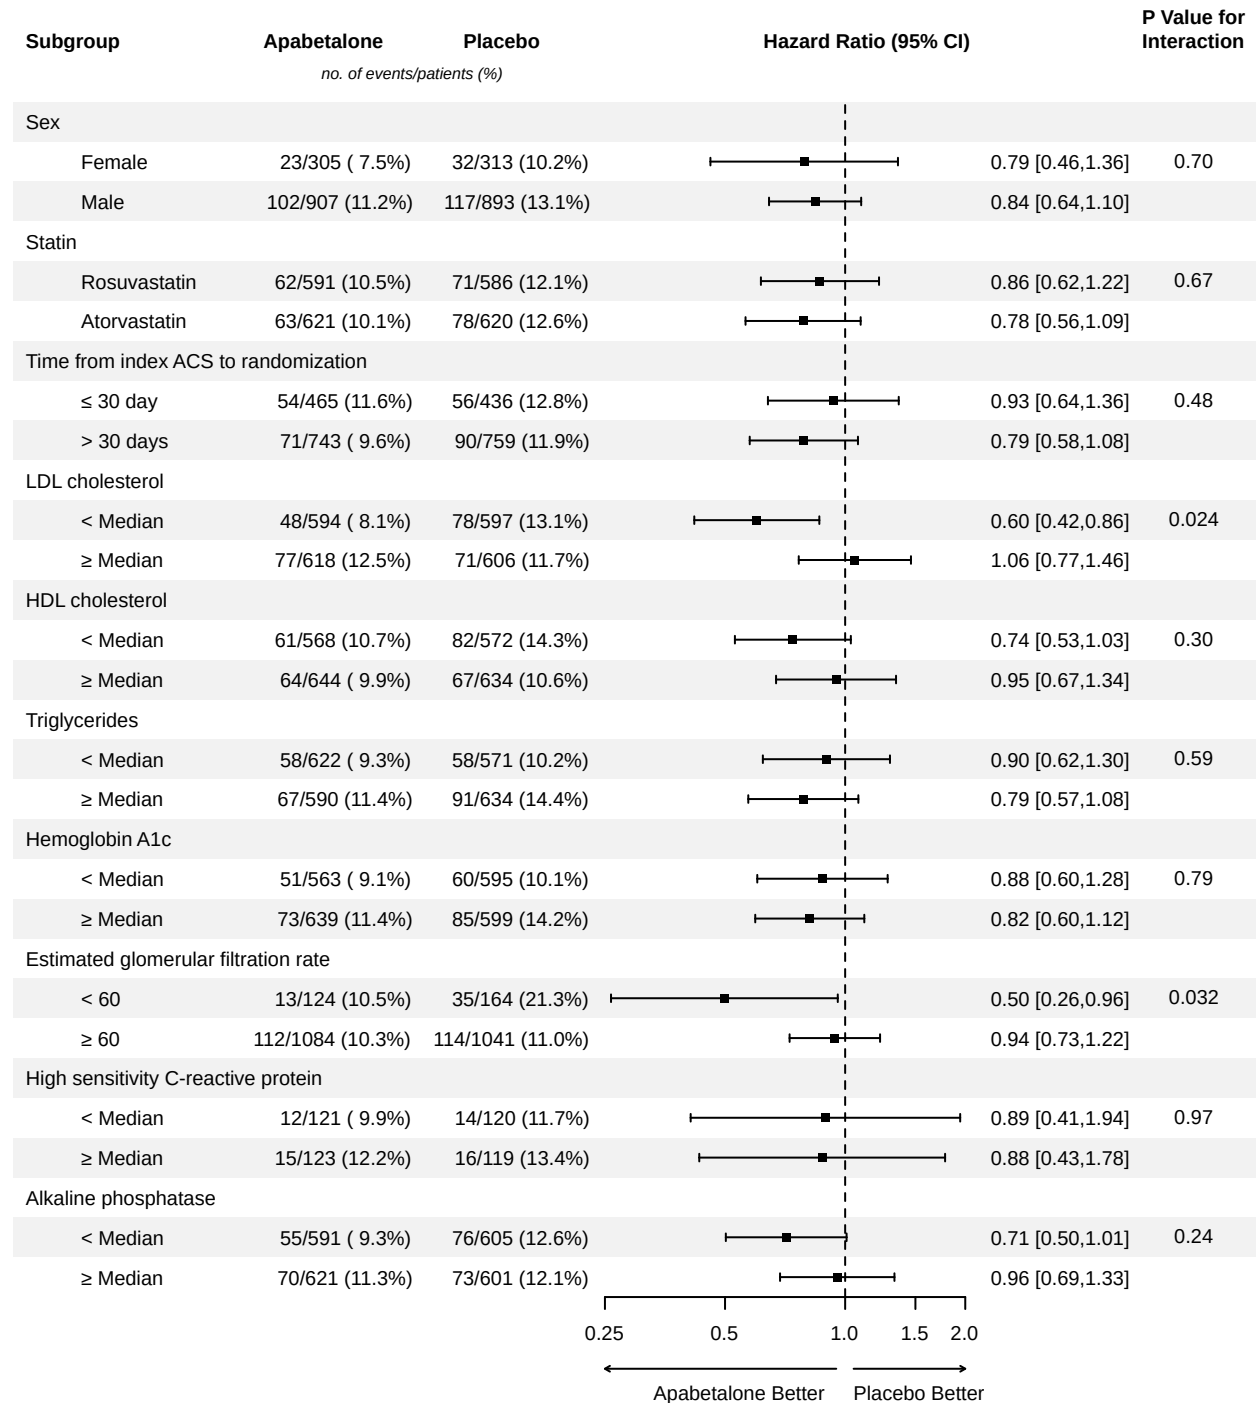

**eFigure 4. Effect of apabetalone versus placebo on biomarkers over time**

The effect of apabetalone versus placebo on levels of (A) LDL cholesterol (B) HDL cholesterol (C) hemoglobin A1c (D) glucose (E) alkaline phosphatase (F) high sensitivity C-reactive protein (hs-CRP) over time are shown as box and whisker plots. Apabetalone increased HDL cholesterol and reduced alkaline phosphatase by 24 weeks ( $P < 0.001$  for both). To convert LDL and HDL cholesterol to millimoles per liter multiply by 0.02586 and to convert glucose to millimoles per liter multiply by 0.05556.

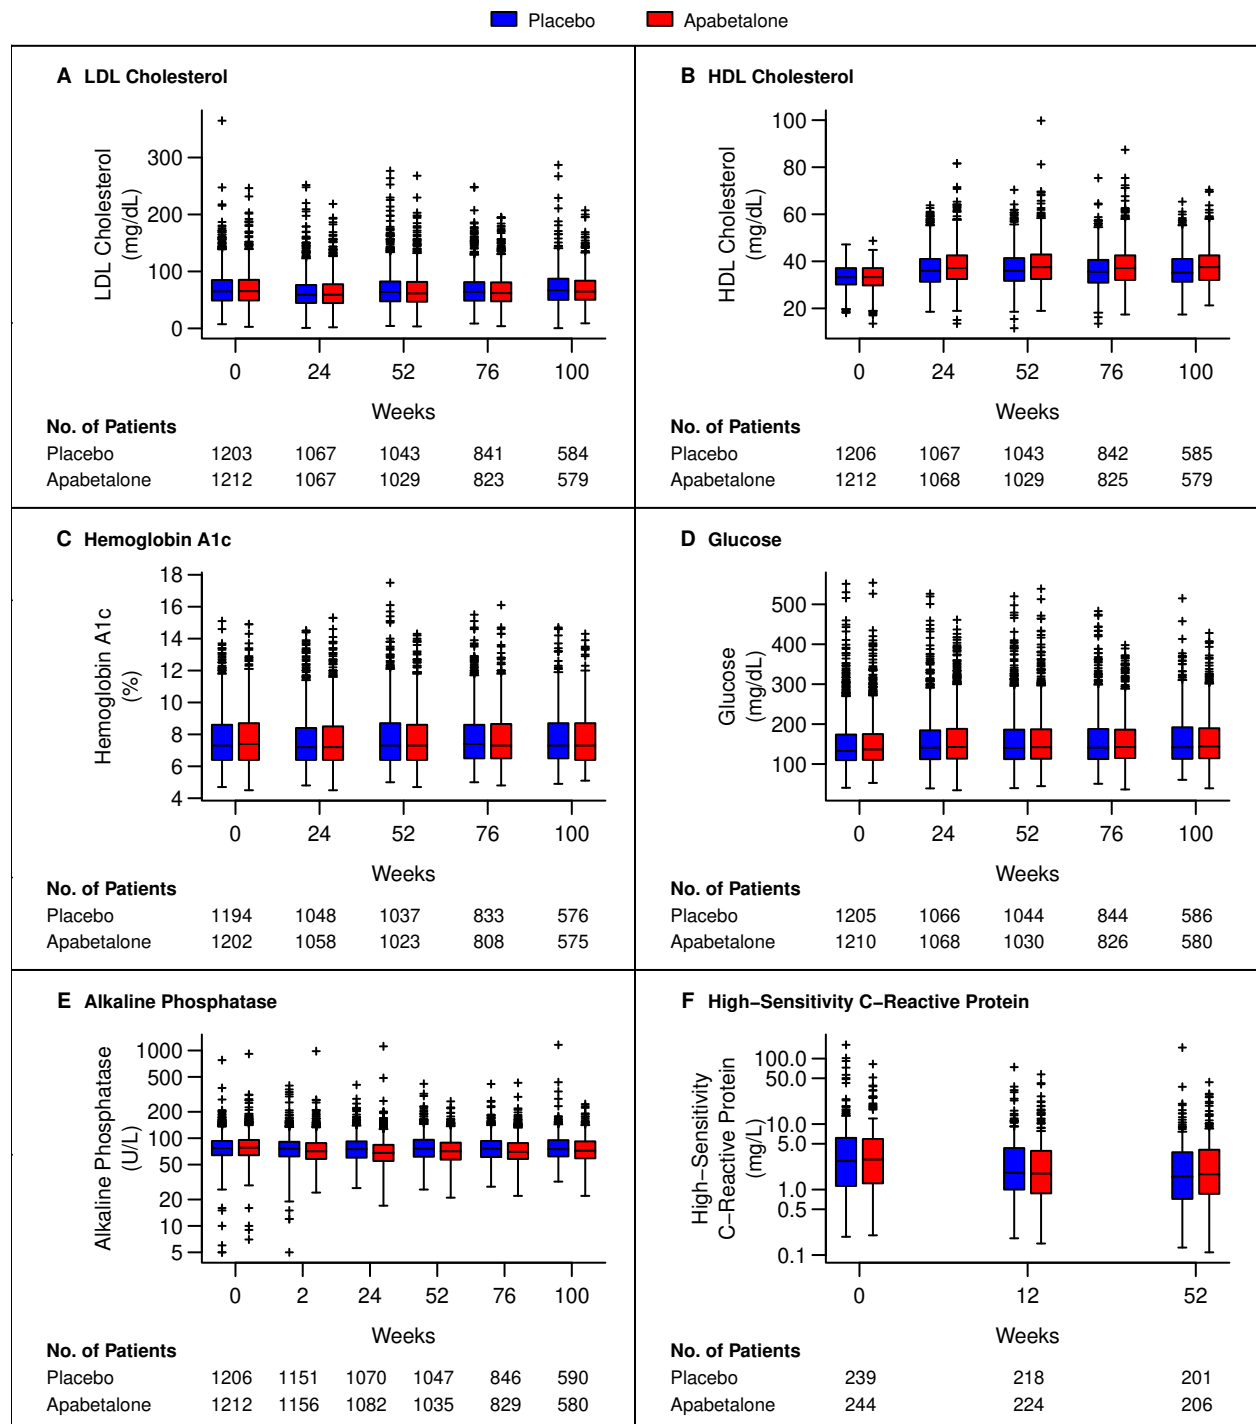

**eFigure 5. Effect of apabetalone versus placebo on additional selected biochemical measures over time**

The effect of apabetalone versus placebo on levels of (A) total cholesterol (B) triglycerides (C) alanine aminotransferase (D) gamma-glutamyl transferase (E) total bilirubin (F) estimated glomerular filtration rate are shown as box and whisker plots. To convert total cholesterol to millimoles per liter multiply by 0.02586 and to convert triglycerides to millimoles per liter, multiply by 0.01129.

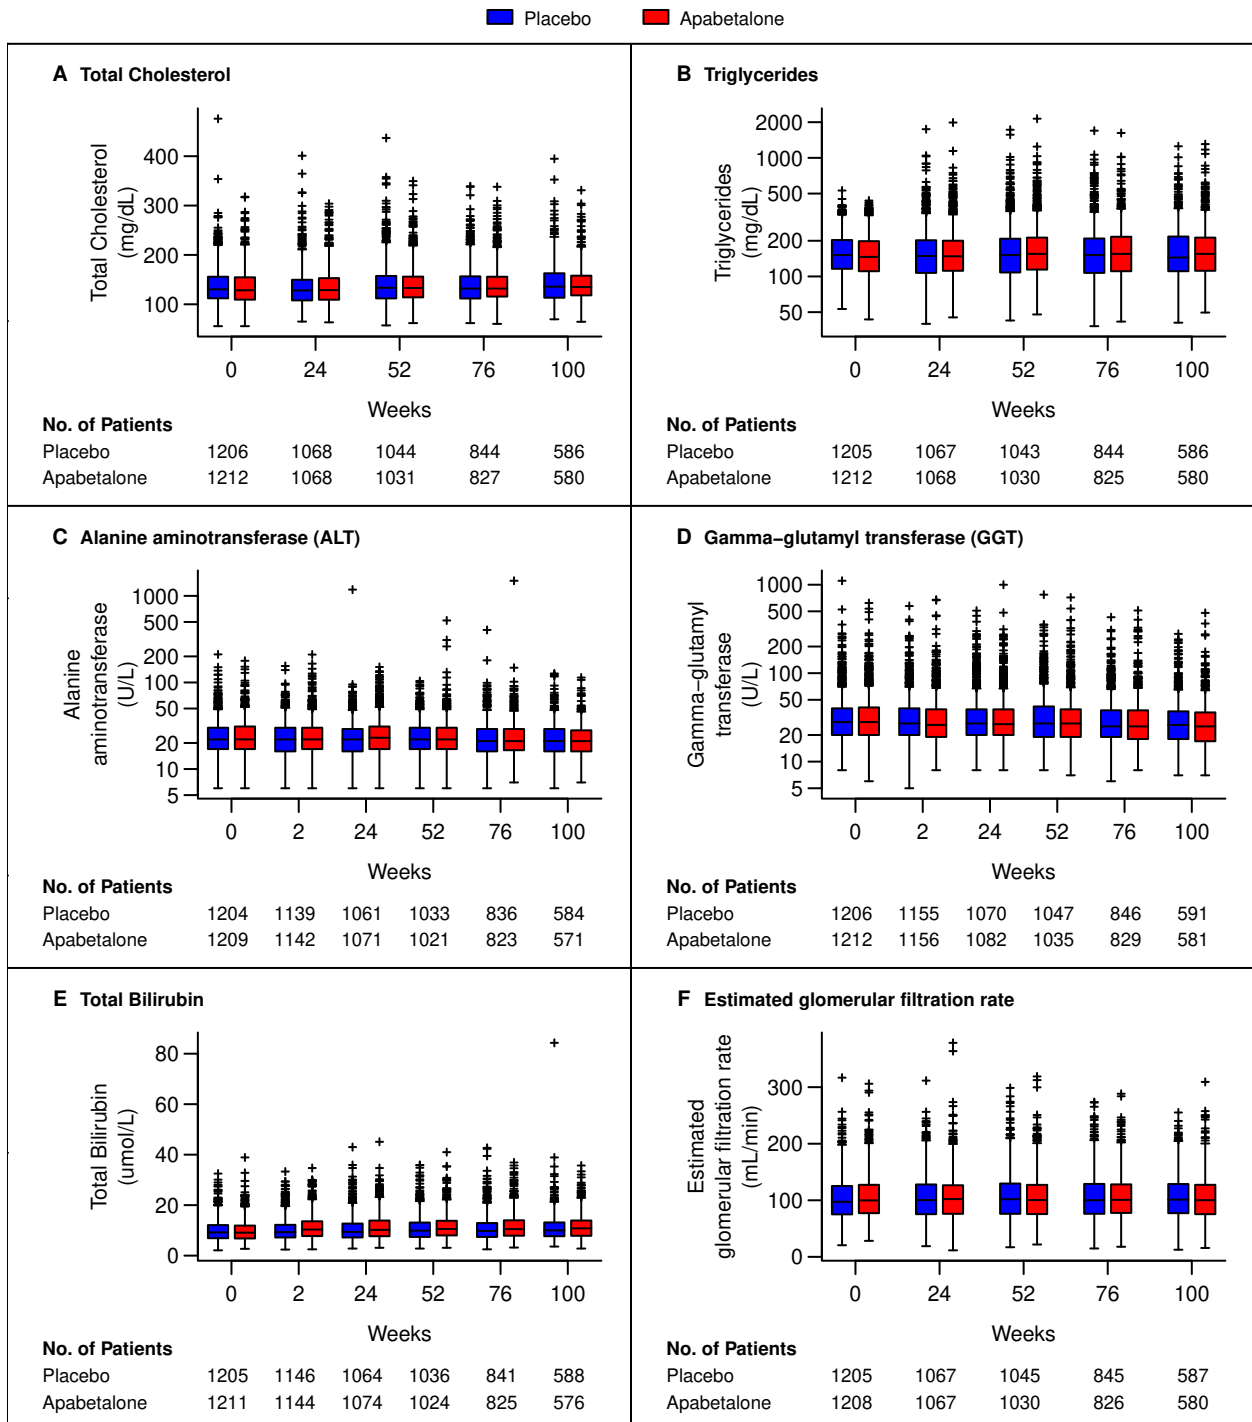

**eFigure 6. eDISH plot assessing liver adverse events**

The standard assessment method using an evaluation of drug-induced serious hepatotoxicity (eDISH) plot of alanine aminotransferase (ALT) concentration versus bilirubin concentration as measured relative to upper limit of normal range (ULN) showed that events were confined to Temple’s Corollary segment of the plot with no Hy’s Law events [ALT>3xULN and total bilirubin >2xULN] in the quadrant known to be associated with drug-induced hepatotoxicity. The single data point on the borderline of this quadrant with active therapy was a 72-year old male in Israel who took a single dose of study medication following randomization then discontinued study medication due to headache but remained in the study for follow-up. Ten months following discontinuation of study drug, laboratory tests showed simultaneous elevation of ALT (peak 13.5X ULN) and bilirubin (peak 2X ULN) coupled with serious adverse events of cholelithiasis and choledocholithiasis. This case was considered to reflect cholelithiasis/choledocholithiasis and to be unrelated to study medication.

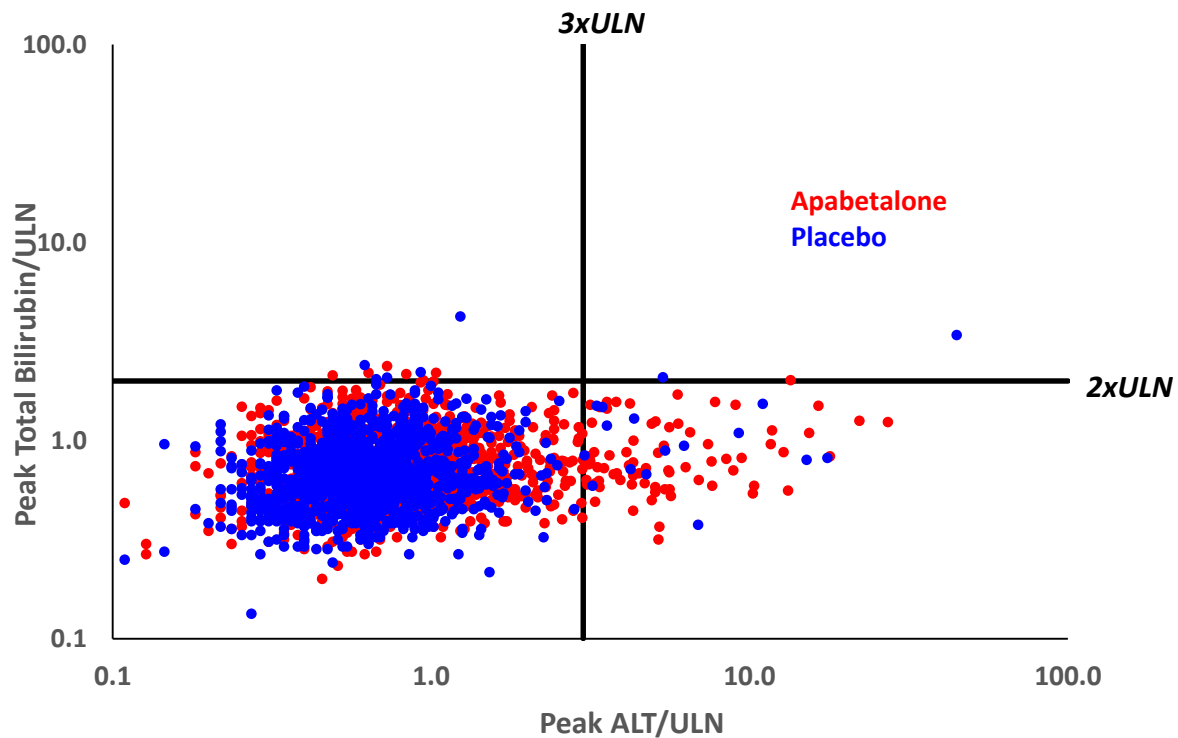

5. eTable. System organ class treatment-emergent adverse events with at least 2% incidence in either group

| System organ class adverse event            | Apabetalone<br>(N=1212) | Placebo<br>(N= 1207) | RR (95% CI)      |
|---------------------------------------------|-------------------------|----------------------|------------------|
| <b>Infections and Infestations</b>          | 291 (24.0)              | 296 (24.5)           | 0.98 (0.85-1.13) |
| Nasopharyngitis                             | 46 (3.8)                | 56 (4.6)             | 0.82 (0.56-1.20) |
| Urinary tract infection                     | 58 (4.8)                | 40 (3.3)             | 1.44 (0.97-2.14) |
| Influenza                                   | 43 (3.5)                | 47 (3.9)             | 0.91 (0.61-1.37) |
| Bronchitis                                  | 25 (2.1)                | 32 (2.7)             | 0.78 (0.46-1.30) |
| Pneumonia                                   | 27 (2.2)                | 26 (2.2)             | 1.03 (0.61-1.76) |
| Upper respiratory tract infection           | 29 (2.4)                | 24 (2.0)             | 1.20 (0.70-2.05) |
| <b>Cardiac Disorders</b>                    | 260 (21.5)              | 278 (23.0)           | 0.93 (0.80-1.08) |
| Angina                                      | 74 (6.1)                | 76 (6.3)             | 0.97 (0.71-1.32) |
| Angina unstable                             | 58 (4.8)                | 41 (3.4)             | 1.41 (0.95-2.08) |
| Acute myocardial infarction                 | 42 (3.5)                | 50 (4.1)             | 0.84 (0.56-1.25) |
| Cardiac failure                             | 22 (1.8)                | 38 (3.1)             | 0.58 (0.34-0.97) |
| <b>Gastrointestinal Disorders</b>           | 186 (15.3)              | 170 (14.1)           | 1.09 (0.90-1.32) |
| Diarrhea                                    | 43 (3.5)                | 44 (3.6)             | 0.97 (0.64-1.47) |
| Abdominal pain                              | 12 (1.0)                | 24 (2.0)             | 0.50 (0.25-0.99) |
| Nausea                                      | 26 (2.1)                | 7 (0.6)              | 3.70 (1.61-8.49) |
| <b>Musculoskeletal</b>                      | 143 (11.8)              | 183 (15.2)           | 0.78 (0.63-0.95) |
| Myalgia                                     | 37 (3.1)                | 33 (2.7)             | 1.12 (0.70-1.77) |
| Back pain                                   | 17 (1.4)                | 28 (2.3)             | 0.60 (0.33-1.10) |
| Pain in extremity                           | 15 (1.2)                | 26 (2.2)             | 0.57 (0.31-1.08) |
| Arthralgia                                  | 11 (0.9)                | 24 (2.0)             | 0.46 (0.22-0.93) |
| <b>Metabolism and nutrition disorders</b>   | 148 (12.2)              | 170 (14.1)           | 0.87 (0.71-1.06) |
| Worsening diabetes mellitus                 | 93 (7.7)                | 93 (7.7)             | 1.00 (0.76-1.31) |
| <b>Vascular Disorders</b>                   | 135 (11.1)              | 142 (11.8)           | 0.95 (0.76-1.18) |
| Hypertension                                | 72 (5.9)                | 72 (6.0)             | 1.00 (0.73-1.37) |
| <b>Investigations</b>                       | 160 (13.2)              | 86 (7.1)             | 1.85 (1.44-2.38) |
| ALT increase                                | 64 (5.3)                | 18 (1.5)             | 3.54 (2.11-5.94) |
| <b>General Disorders</b>                    | 111 (9.2)               | 109 (9.0)            | 1.01 (0.79-1.30) |
| Non-cardiac chest pain                      | 33 (2.7)                | 39 (3.2)             | 0.84 (0.53-1.33) |
| <b>Blood and Lymphatic System Disorders</b> | 52 (4.3)                | 52 (4.3)             | 1.00 (0.68-1.45) |
| Anemia                                      | 36 (3.0)                | 40 (3.3)             | 0.90 (0.58-1.40) |

## 6. Narratives of two cases of elevated alanine aminotransferase and bilirubin

There were two cases with simultaneous elevation of alanine aminotransferase (ALT)  $\geq$  3X ULN and bilirubin  $\geq$  2X ULN.

The first patient was a 39-year old male in Taiwan randomized to placebo. At enrollment, he had normal liver function tests but was seropositive for hepatitis B surface antigen (HBsAg) and e antigen (HBeAg), seronegative for hepatitis B e-antibody, and to have hepatitis B viral load of 1.1 million IU/mL. He was not receiving antiviral therapy for hepatitis B at randomization. Five months after randomization he reported fatigue and jaundice was noted. ALT peaked at 43X ULN and bilirubin at 3.4X ULN. Study medication was discontinued. HBsAg and HBeAg remained positive throughout. Hepatitis B viral load reached 1.6 million IU/ml at 4 months post randomization, then decreased to 16,534 IU/mL three months later. Anti-HBe antibody titer became positive six months following randomization. This case was considered to be spontaneous hepatitis B flare reflecting immune clearance of hepatitis B virus with possible HBeAg to anti-HBe seroconversion.

The second patient was a 72-year old male in Israel randomized to apabetalone. The patient took a single dose of study medication following randomization then discontinued study medication due to headache but remained in the study for follow-up. Ten months following discontinuation of study medication laboratory tests showed simultaneous elevation of ALT (peak 13.5X ULN) and bilirubin (peak 2X ULN) coupled with serious adverse events of cholelithiasis and choledocholithiasis. This case was considered to reflect cholelithiasis/choledocholithiasis to be unrelated to study medication.
