# Supplementary material
Source: PubMed Central journal article supplement (PMC7101505)
Supplement: jama-323-1565-s003.pdf [file jama-323-1565-s003.pdf]

## **Data Sharing Statement**

Ray. Effect of Apabetalone Added to Standard Therapy on Major Adverse Cardiovascular Events in Patients With Recent Acute Coronary Syndrome and Type 2 Diabetes. *JAMA*. Published March 27, 2020. 10.1001/jama.2020.3308

### **Data**

**Data available:** No
